# 1    **Synthetic Photosynthetic Consortia Define Interactions Leading to Robustness and** 2    **Photoproduction**

3

4

5    Stephanie G. Hays<sup>1,2</sup>, Leo L.W. Yan<sup>3</sup>, Pamela A. Silver<sup>1,2#</sup>, Daniel C. Ducat<sup>3,4#</sup>

6

7

8    <sup>1</sup>Department of Systems Biology, Harvard Medical School, Boston, MA, USA;

9    <sup>2</sup>Wyss Institute for Biologically Inspired Engineering, Harvard University, Boston, MA,

10    USA;

11    <sup>3</sup>MSU-DOE Plant Research Laboratory, Michigan State University, East Lansing, MI,

12    USA;

13    <sup>4</sup>Department of Biochemistry & Molecular Biology, Michigan State University, East

14    Lansing, MI, USA.

15

16    Running Head: Synthetic Photosynthetic Consortia Interact & Produce

17

18    #Address correspondence to either Pamela A. Silver, [Pamela\\_silver@hms.harvard.edu](mailto:Pamela_silver@hms.harvard.edu) or

19    Daniel C. Ducat, [ducatdan@msu.edu](mailto:ducatdan@msu.edu)

# ABSTRACT

Microbial consortia composed of autotrophic and heterotrophic species abound in nature, yet examples of synthetic communities with mixed metabolism are limited in the laboratory. Herein, we construct artificial synthetic consortia consisting of sucrose-secreting cyanobacteria, *Synechococcus elongatus* PCC 7942, paired with three disparate heterotrophs: *Bacillus subtilis*, *Escherichia coli*, or *Saccharomyces cerevisiae*. Comparison of these different dyads highlights underlying interactions in co-culture. We witness both engineered and emergent interactions between cyanobacterium and heterotroph shared across heterotrophic species. Heterotrophs can consume carbon fixed photosynthetically by cyanobacteria while non-sucrose byproducts of photosynthesis can negatively impact heterotroph growth. Surprisingly, all tested heterotrophic species can positively impact cyanobacterial growth in co-culture in comparison to monoculture. Growth of co-cultures is witnessed in batch and continuous culture as well as on agar plates. Co-cultures persist long-term and can survive perturbation, particularly when heterotrophic sucrose uptake is enhanced and/or heterotrophic sensitivity to byproducts of photosynthetic metabolism is mitigated. This level of robustness is infrequently witnessed in synthetic microbial communities. Furthermore, by exchanging partner heterotrophs, we demonstrate flexible, phototrophic production of alpha-amylase and polyhydroxybutyrate in co-cultures containing specialized strains of *B. subtilis* and *E. coli*, respectively. Production can be improved via engineered intervention, i.e. increased efficiency growing on sucrose, showing promise for future tuning of these communities as production platforms. Altogether these synthetic microbial consortia provide a platform to study autotroph-heterotroph interactions, while demonstrating promising

flexibility and stability for potential photoproduction strategies that capitalize on multi-species interactions.

## **IMPORTANCE**

We describe a series of synthetic communities in which engineered cyanobacteria fix and secrete carbon to support growth of a broad range of evolutionarily-unrelated model heterotrophs. Because of the unprecedented flexibility of this consortia design, we can begin to characterize engineered and emergent interactions shared across multiple autotroph/heterotroph pairings. These observations allow us to evaluate characteristics and design principles that influence consortia robustness in a species-independent manner. For example, cyanobacterial productivity is improved by cohabitation with a broad range of heterotrophic species; an important observation for microalgal bioproduction. We show that the modular nature of our communities also allows them to be readily “reprogrammed” for photoproduction of a variety of compounds by substitution of the heterotrophic partner species. The unusual robustness and flexibility exhibited by our engineered consortia demonstrate promise as a platform that could be developed for the study of nascent symbioses, or as a highly-versatile photoproduction strategy.

# INTRODUCTION

Microbial communities dominate natural environments while, historically, axenic experiments monopolize laboratories. While much has been gleaned from isolated microbes, there is increasing emphasis on the study of complex natural consortia. This interest is driven by the ubiquity and diversity of microbiomes related to human health, ecology, and bioindustrial applications. Microbial consortia divide metabolic labor to capitalize on environmental resources, are resistant to invasion, and are robust when faced with perturbations, all characteristics that are interesting biologically as well as desirable in engineered systems (1–3). Yet natural consortia inherently contain many species that are highly integrated; disentangling the interactions and functions within a community can be difficult (4–7).

Designed microbial communities can be used to gain insight into microbial ecology or be applied to industry and remediation. *Artificial consortia* consist of wild-type microbes with naturally synergistic interactions, while *synthetic consortia* are microbial communities engineered to interact (e.g. via signaling molecules or traded metabolites) - where the introduced communication and/or species are not found in nature (3). Because artificial consortia interact based on endogenous pathways, often in genetically intractable strains, tuning interactions to explore different questions or to program new functions is difficult relative to synthetic communities. Indeed, tunable designs within the nascent field of synthetic consortium engineering have provided bottom-up insights into complex dynamics including population behavior, game theory, pattern formation, and cross-feeding (8–13).

Despite their promise, synthetic systems have often been limited in construction to engineered signals (i.e. quorum sensing) or complementary auxotrophies within highly-related organisms (13–17). The inflexibility of most consortia designs means that engineered interactions are highly contextualized to a limited number of species, confounding the identification of general trends in interaction rather than scenario-specific observations. Additionally, species with different growth modes (i.e. autotrophs and heterotrophs) are relatively rare in synthetic designs in contrast to natural consortia (18–20). Finally, contrary to the robustness seen in natural microbial communities, synthetic consortia are frequently fragile, functioning only for short time frames or requiring artificially structured environments (21, 22). Because of these limitations in scope, as well as the scarcity in number of synthetic communities, academic and industrial application of such consortia is restricted.

A *Synechococcus elongatus* PCC 7942 strain previously engineered to secrete sucrose is ideally suited as a phototroph for incorporation into consortia with heterotrophs (23). When faced with osmotic pressure, *S. elongatus* accumulates the compatible solute sucrose (24, 25) which can be exported through heterologous expression of the sucrose transporter gene, *cscB*. CscB is a proton/sucrose symporter (26, 27) that functions to secrete sucrose in cyanobacteria because of high environmental pH (pH 8). *CscB<sup>+</sup> S. elongatus* can divert up to 80% of photosynthetically-fixed carbon to soluble sucrose, generating 36 mg of sucrose per liter per hour of illumination. Furthermore, expression of

*cscB* in this *S. elongatus* strain can be regulated via induction with isopropyl-beta-D-1-thiogalactopyranoside (IPTG) (23).

In this work, we pair *cscB*<sup>+</sup> *S. elongatus* with varied heterotrophs (*Escherichia coli*, *Bacillus subtilis*, or *Saccharomyces cerevisiae*) to investigate general rules of microbial interaction while maintaining consortia tunability. In these consortia, *S. elongatus* provides the sole carbon source for consumption by the heterotrophic species. We see growth of both heterotrophs and cyanobacteria within all consortia, detail emergent interactions between microbes, and demonstrate capacity for long-term community persistence. Flexibility in community composition allows consortia to be functionalized for photoproduction of metabolites and proteins via co-culture with specialized heterotrophic partners. Together these findings develop a versatile platform to investigate interactions between phototrophs and heterotrophs while showing promise as functionalized co-cultures for bioproduction.

## MATERIALS AND METHODS

**Strains, media, and axenic characterization.** *S. elongatus* PCC7942 (obtained from ATCC #33912) was engineered to secrete sucrose through the expression of the sucrose symporter CscB (23). Axenic cyanobacteria were checked for contamination via plating on rich media. *E. coli* W was obtained from ATCC (#9637) and the corresponding W  $\Delta$ *cscR* strain was generously provided by Dr. Claudia Vicker's laboratory (28). *B. subtilis* 168 was obtained from ATCC (#23857) and *B. subtilis* 3610  $\Delta$ *sinI* was generously provided by the lab of Dr. Richard Losick (29). A  $\Delta$ *sinI* mutant strain of 3610 was used

to minimize chained growth making CFU counts of the strain reproducible (29). All strains are listed in Table 1. *S. elongatus* was propagated in BG-11 (Sigma Aldrich) plus 1 g/L HEPES, pH 8 in constant light at 35 °C. *B. subtilis* and *E. coli* were propagated in Luria Broth (LB) while *S. cerevisiae* was maintained in YEPD media. *E. coli*, *B. subtilis*, and *S. cerevisiae* were struck from frozen stocks on rich media plates (LB for bacteria and YEPD for yeast). Co-culture media were optimized for either prokaryotes (<sup>CoB</sup>BG-11) or *S. cerevisiae* (<sup>CoY</sup>BG-11). <sup>CoB</sup>BG-11 consists of BG-11 supplemented with 106mM NaCl, 4mM NH<sub>4</sub>Cl and 25mM HEPPSO, pH 8.3-KOH. Indole (100 uM) was added to *B. subtilis* 168 co-cultures as indicated and in alpha-amylase experiments. <sup>CoY</sup>BG-11 consists of BG-11 supplemented with 0.36g/L Yeast Nitrogen Base without amino acids (Sigma Aldrich), 106mM NaCl, 25mM HEPPSO, pH 8.3-KOH and 1mM KPO<sub>3</sub>. Solid co-culture plates were composed of <sup>CoB</sup>BG-11 media with 1% autoclaved noble agar (BD Biosciences).

For characterization of *S. elongatus* growth and sucrose production, *S. elongatus* was cultured axenically in baffled flasks of <sup>CoB</sup>BG-11 or <sup>CoY</sup>BG-11 and allowed to acclimate for ≥ 12 hours. At time 0, 25 mL cultures were adjusted to OD<sub>750</sub> = 0.5 and 1mM IPTG was added, as appropriate. Cultures were monitored at 24 hour intervals by withdrawal of 1mL culture. OD<sub>750</sub> was measured via photospectrometer (ThermoScientific NonoDrop 2000c) and culture supernatant was analyzed for sucrose content via a colorimetric Glucose-Sucrose Assay (Megazyme). To prepare heterotrophic strains, single colonies were picked into their respective rich media and grown until turbid at varying temperatures before co-culture (37 °C for *E. coli* and *B. subtilis*; 30 °C for *S.*

*cerevisiae*). Cells were diluted into the appropriate co-culture media +2% sucrose to acclimate to co-culture media, and maintained within log phase growth ( $OD_{600} < 0.70$ ) before use in co-cultures. All acclimating cultures and co-cultures were grown at 35 °C, 150 rpm, 2%  $CO_2$ , in light (PAR =  $\sim 80 \mu\text{mol}$  with 15W Gro-Lux Sylvania fluorescent bulbs) within a Multitron Infors HT incubator. Heterotrophic growth was measured by inoculating rinsed cells at 0.01  $OD_{600}$  (bacteria) or 0.05  $OD_{600}$  (yeast) into fresh co-culture media at the indicated sucrose concentration. Data for growth rate was collected from 25 mL flask cultures while 96-well plates with 1 mL culture volumes were used to assay the gradient of [sucrose] in Fig. 2C; plates were read on a BioTek Synergy Neo plate reader.

**Batch co-cultivation & quantification.** Flask co-cultures were completed in 25 mL volumes in baffled flasks. Cyanobacteria and heterotrophs were acclimated to  $^{CoB}$ BG-11 or  $^{CoY}$ BG-11 media prior to inoculation into co-cultures. All co-cultures were grown at 35 °C, 150 rpm, 2%  $CO_2$ , in light (15W; Gro-Lux; Sylvania) within a Multitron Infors HT incubator. 1 mM IPTG was added when indicated. Growth in co-cultures was monitored every 12 hours: *S. elongatus* was measured by the count of gated red-fluorescent events on a quantitative flow cytometer (BD Accuri); heterotrophs were assayed by plating dilution series on rich media to count colony forming units (CFU). Estimates of W303<sup>Clump</sup> cell number were derived by counting CFUs, but numbers were adjusted for the  $\sim 6.6$  cells/clump as previously reported (31), and as confirmed under our culture conditions. For dilution experiments, co-cultures containing *E. coli* or *B. subtilis* were grown for 24 hours before 10 or 100 fold dilutions.



**Heterotroph exposure to variable [cyanobacteria].** *B. subtilis* and *E. coli* were recovered from rich media as above, washed in <sup>CoB</sup>BG-11 and inoculated at an OD<sub>600</sub> of .01 in <sup>CoB</sup>BG-11 media + 2% sucrose with cyanobacteria at different densities (OD<sub>750</sub> 0, 0.5, 1, and 2). *S. cerevisiae* was treated identically except they were inoculated at  $\sim 3 \times 10^5$  cells/mL (OD<sub>750</sub> = 0.03) and <sup>CoY</sup>BG-11 was used. These samples were split into two 36-well plates and incubated and exposed to either constant light or dark conditions while maintaining the other growth parameters. Heterotroph counts were determined by plating on rich media for colony counts as above after initial setup (time 0) and after 12 hours of culture. Ratios of the viable cell counts from the light vs. dark cultures or log<sub>10</sub> of these ratios after 12 hours are reported.

**Structured growth perturbation.** To test the ability of co-cultures to withstand environmental perturbation, flask co-cultures were inoculated and grown as previously described for 24 hours before plating on 100 uL of co-cultures were plated on solid co-culture Petri dishes. After five days, uneven lawns of heterotrophs and cyanobacteria arose. Cells were picked from these plates into 96-well plates and allowed to grow for 2-5 additional days. Any well that demonstrated cyanobacterial growth (as judged visually by green appearance) by the end of 48 hours was spotted on rich media to determine the presence or absence of heterotrophic symbionts. Solid culture and 96-well plate growth was completed at 35 °C, 0 rpm, 2% CO<sub>2</sub>, in constant light (15W; Gro-Lux; Sylvania) within a Multitron Infors HT incubator.

**Heterotroph spotting on cyanobacterial lawns.** Lawns of *cscB*<sup>+</sup> cyanobacteria were achieved via spreading of 250 uL of *cscB*<sup>+</sup> cyanobacteria (OD<sub>750</sub> 0.5) on solid co-culture plates with or without 1 mM IPTG. After the cyanobacteria had absorbed on to the plate (>3 hours in the dark), 3 uL drops of heterotrophs were spotted on to the lawns. Heterotrophs had been previously grown up in rich media and washed three times to remove any media components before spotting. Media blanks and boiled cells were spotted as negative controls. Plates were then grown in 35 °C, 2% CO<sub>2</sub>, in constant light (15W; Gro-Lux; Sylvania) within a Multitron Infors HT incubator.

**Long-term continuous co-cultivation.** Long-term co-cultures were incubated in Phenometrics Environmental Photo-Bioreactors (33) with 150mL liquid volumes of a mix of *cscB*<sup>+</sup> *S. elongatus* with either *S. cerevisiae* W303<sup>Clump</sup> or *E. coli* W  $\Delta$ *cscR* in the appropriate co-culture BG-11 media + 1mM IPTG. Reactors were seeded with  $\sim 1 \times 10^8$  cells/mL of *S. elongatus* (OD<sub>750</sub> = 0.5) and a final concentration of heterotroph equivalent to  $\sim 1 \times 10^6$  W303<sup>Clump</sup> cells/mL (final OD<sub>600</sub>  $\sim 0.1$ ) or  $\sim 5 \times 10^7$  W  $\Delta$ *cscR* cells/mL (OD<sub>600</sub>  $\sim 0.05$ ). Light was provided by onboard white, high-power LEDs (400  $\mu$ mol m<sup>2</sup> s<sup>2</sup>) continuously for *E. coli* W  $\Delta$ *cscR* cultures, and with a 16:8 light:dark photoperiod for W303<sup>Clump</sup> co-cultures. The total density of co-cultures were monitored by onboard infrared diodes, following a brief (3-12 hour) acclimation period where the time-averaged optical density was allowed to settle to a fixed point following culture initiation, this measurement was used to control attached peristaltic pumps that eject fresh media to maintain the set target OD as previously described (33). Co-culture temperature was maintained at 30°C by a heated jacket; cells were agitated continuously by a stirbar.

Daily, ~2 mL of co-culture volume was withdrawn and cyanobacterial and heterotrophic cell counts determined by flow cytometry and plating, respectively (as described above).

**Alpha-amylase production and quantification.** For production of alpha-amylase from *B. subtilis* strain 168 was used in 8 mL cultures of <sup>CoB</sup>BG-11 with 100 uM indole in 6 well dishes. Alpha-amylase production was measured after 24 hours of culture. Alpha-amylase activity in supernatants was measured immediately after pelleting of cultures with the EnzChek Ultra Amylase Assay Kit, Molecular Probes Life Technologies using the manufacturer's protocol. Western blots confirmed presence of alpha-amylase in supernatants after addition of NuPAGE LDS sample buffer (Invitrogen) followed by 10 minutes at 100 °C. Protein (10 uL) was run on NuPage 4-12% Bis-Tris gels (Life Technologies) for in MES SDS running buffer for 50 minutes at 185V. The iBlot 2 Dry Blot System (ThermoScientific) was used to transfer protein to nitrocellulose membranes (iBlot 2 NC Regular Transfer Stacks). Anti-alpha amylase antibodies (polyclonal rabbit; LS-C147316; LifeSpan BioSciences; 1:3,000 dilution) were used as the primary antibody followed by peroxidase-conjugated donkey anti-rabbit antibodies (AffiniPure 711-035-152 lot 92319; Jackson ImmunoResearch; 1:5,000 dilution) as the secondary antibody. The western blot was visualized via Western Lightning® Plus-ECL, Enhanced Chemiluminescence Substrate (PerkinElmer, ProteinSimple FluorChem M). Purified alpha-amylase (Sigma Aldrich) was used as a control in all assays.

**PHB Production & quantification.** *E. coli* strains were transformed with pAET41 (Table 1; 32) before use in co-cultures for production. Co-cultures were set up as described in 25 mL flasks. After one week of growth, the entire culture was spun down, frozen, and stored at -80 until PHB content was quantified. PHB content was quantified by standard methods (34, 35). Briefly: cell pellets were digested with concentrated H<sub>2</sub>SO<sub>4</sub> at 90 °C for 60 min. The digestion solution was diluted with H<sub>2</sub>O by 500 times and passed through 0.2 µm filter. The solutions were subsequently analyzed by a high performance liquid chromatography (HPLC, Agilent HPLC 1200) equipped with Aminex HPX-87H column and UV absorption detector (35). The volume of each sample injection was 100 µL. The mobile phase was 2.5 mM H<sub>2</sub>SO<sub>4</sub> aqueous solution, with a flow rate of 0.5 mL/min for 60 min. 5 mM sodium acetate (Sigma Aldrich) was added as an internal standard. The concentrations of PHB were determined by comparing the peak area with that in standard curves from 0.1 ~ 30 mM.

## RESULTS

### Cyanobacteria consortia with heterotrophs

Systems where heterotrophs depend on a photosynthetic partner for growth were developed. Engineered cyanobacteria, *cscB*<sup>+</sup> *S. elongatus*, forms the photosynthetic component – carbon dioxide is fixed and made accessible to various heterotrophs for growth (23). Model heterotrophic species with well-developed molecular tools were selected, and include Gram-positive and Gram-negative bacteria as well as yeast (Fig. 1A).

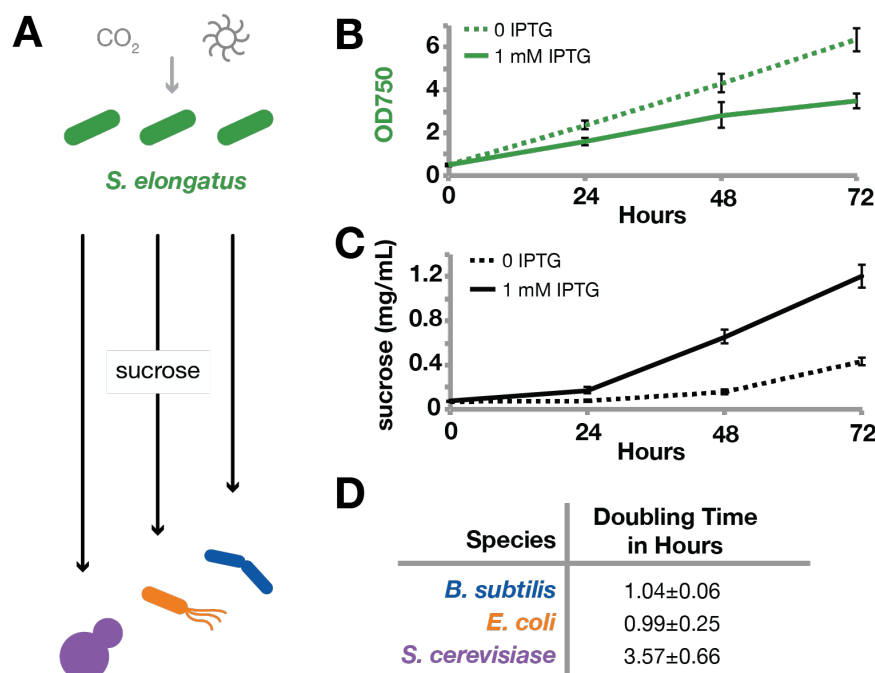

**Fig. 1 Axenic characterizations of candidate strains.**

(A) This schematic shows the engineered microbial community design - *cscB*<sup>+</sup> *S. elongatus* (green) capture light and CO<sub>2</sub> via photosynthesis. Fixed carbon is then secreted as sucrose (black arrows) to support the growth of *B. subtilis* (blue), *E. coli* (orange), or *S. cerevisiae* (purple). Axenic *cscB*<sup>+</sup> *S. elongatus* was grown in <sup>CoB</sup>BG-11 with (solid line) and without IPTG (dashed line) to induce sucrose secretion. Cell density (B) and sucrose levels in culture supernatants (C) were measured. Error bars are standard deviation of 8 biological replicates. For characterization of cyanobacteria in <sup>CoY</sup>BG-11 see Fig. S1. (D) Heterotroph growth in isolation was characterized via growth rate in co-culture buffer supplemented with 2% sucrose. Error is standard deviation of ≥ 3 replicates.

Growth of consortia was designed to rely upon sucrose secretion by *cscB*<sup>+</sup> *S. elongatus* in response to osmotic pressure and IPTG induction followed by sucrose consumption by heterotrophs. We optimized media with compositions of nitrogen, salt, and buffer – these are termed <sup>CoB</sup>BG-11 for use in cyanobacteria/bacteria consortia and <sup>CoY</sup>BG-11 for the cyanobacteria/yeast consortium (see Materials and Methods). We

verified that *S. elongatus* grows and produces sucrose in these media (Fig. 1B, Fig. S1). When *cscB* expression is induced, growth of the cyanobacteria is slightly impaired due to the efflux of carbon (Fig. 1B,1C, Fig. S1A; [Ducat et al. 2012](#)). Consequently, increased amounts of sucrose are present when *S. elongatus* is induced to express *cscB* (Fig. 1C, Fig. S1B). Separately, we verified that all heterotrophs are capable of growth in these media when exogenous sucrose (2%) is provided as the sole carbon source (Fig. 1D).

Sucrose-producing cyanobacteria, *cscB*<sup>+</sup> *S. elongatus*, directly support heterotroph growth in co-cultures that contain no external carbon sources (Fig. 2, Fig. S2). In all consortia, *S. elongatus* grows with a single heterotrophic microbe in the appropriate co-culture media (see Materials and Methods) with or without 1mM IPTG to induce *cscB* expression and sucrose export. Growth of cyanobacteria and viable heterotrophs in co-cultures were tracked over 48 hours in constant light via flow cytometry and analysis of colony forming units (CFUs), respectively.

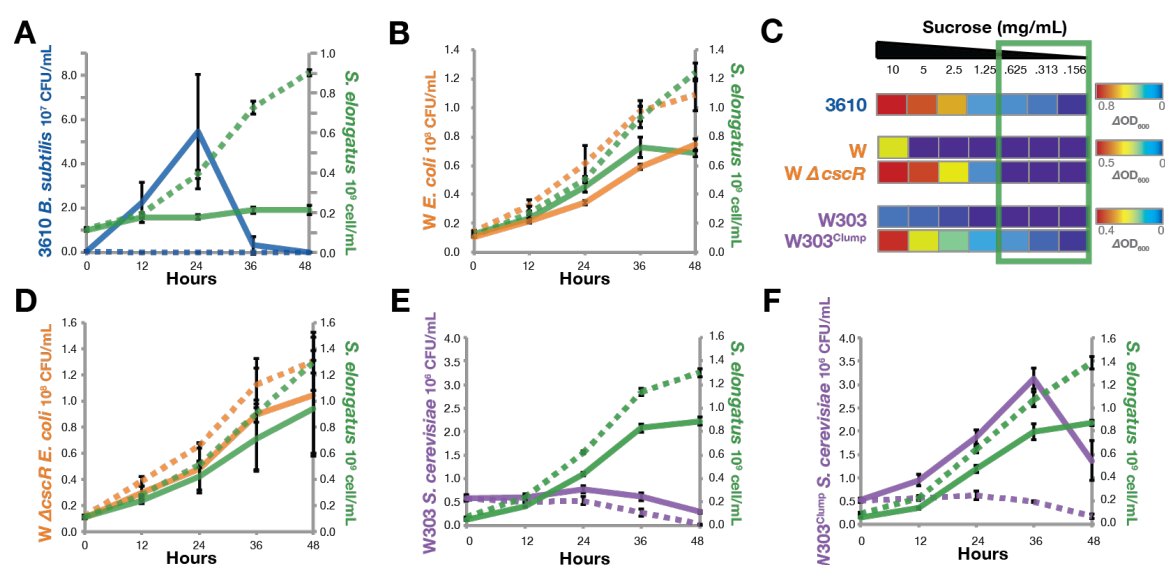

**Fig. 2 *S. elongatus* supports microbial communities in batch culture.** Batch cultures of *cscB*<sup>+</sup> *S. elongatus* in co-culture with *B. subtilis* (blue), *E. coli* (orange), or *S. cerevisiae* (purple) were grown in constant light. *cscB*<sup>+</sup> *S. elongatus* counts/mL were determined by flow cytometry every 12 hours for co-cultures containing *B. subtilis* (A; green), *E. coli* (B, D; green), and *S. cerevisiae* (E, F; green). Co-cultures with uninduced (dashed lines) or induced CscB expression (solid lines) were tested. Heterotroph viability was monitored by colony forming unit (CFU) for all *B. subtilis* (A; blue), *E. coli* (B strain W, D strain W  $\Delta cscR$ ; orange) and *S. cerevisiae* (E strain W303, F strain W303<sup>Clump</sup>; purple) co-cultures. Data for A, B, D, E, and F, are representative, same-day experiments where error bars are the standard error in 3 biological replicates. Additional replicates in Fig. S2. (C) Axenic heterotroph growth was tested in defined media with varying concentrations; the range of sucrose that *cscB*<sup>+</sup> *S. elongatus* can secrete in 48 hours is denoted by a green box. Average OD<sub>600</sub> is shown as a metric of growth for  $\geq 6$  biological replicates). OD<sub>600</sub> was correlated to viable colony forming units (CFU) in Fig. S3. No contaminants/heterotrophic colonies grew from axenic controls.

*B. subtilis* growth in co-culture is dependent on IPTG-induced sucrose secretion (Fig. 2A, Fig. S2A). Without induction of *cscB* to enable sucrose secretion, *B. subtilis* fails to grow showing sensitivity to sucrose availability. When IPTG is present in co-cultures, the growth of *B. subtilis* in co-culture is not monotonic; viability decreases after 48 hours of induction.

*E. coli*, in contrast, grows monotonically independent of induction of sucrose secretion (Figure 2B, Figure S2B & S2C). In axenic culture, *E. coli* W only exhibits growth when supplemented with > 5 mg/mL sucrose (Fig. 2C), yet *cscB*<sup>+</sup> *S. elongatus* secretes ~1 mg/mL of sucrose by in 48 hours of growth (Fig. 1C). We also tested the growth of *E. coli* engineered for increased growth in low sucrose (hereafter referred to as

the  $\Delta cscR$  *E. coli* strain; [Arifin et al. 2011](#)). Although  $\Delta cscR$  *E. coli* grow on lower concentrations of sucrose axenically ( $\geq 1.25$  mg/mL; Fig. 2C), we observed the same monotonic growth pattern with decreased growth in the presence of IPTG (Fig. 2A & 2C, Fig. S2B & S2C). This suggests that in the first days of co-culture, while exported sucrose concentrations are low ( $\leq 1$  mg/mL), *E. coli* strains cannot utilize sucrose effectively and dominantly depend on other metabolites from *S. elongatus*, such as extracellular polymeric substances (EPS; [Villa et al. 2015](#); [Rossi & De Philippis 2015](#)).

*S. cerevisiae* growth in co-culture requires genetic mutations to enhance sucrose utilization. Wild type *S. cerevisiae* W303 did not grow in co-culture regardless of IPTG induction. This is likely due to poor growth in low sucrose concentrations (Fig. 2C). To overcome *S. cerevisiae* W303's limited growth, an engineered strain, hereafter referred to as W303<sup>Clump</sup>, was examined. W303<sup>Clump</sup> was derived from previous directed evolution experiments of *S. cerevisiae* W303 in low sucrose media, which revealed mutations that enhance fitness in dilute sucrose ([31](#)). W303<sup>Clump</sup> (originally called Recreated02; [Koschwanez et al. 2013](#)), contains a nonsense mutation in ACE2 as well as other causative fitness-enhancing mutations that arose (in genes CSE2, IRA1, MTH1, and UBR1). Mutations to ACE2 compromise the degradation of the mother-daughter septum resulting in clumps of cells (~6.6 cells/clump on average). These aggregates grow in low sucrose due to increased local cell concentration and increased hexose availability after extracellular cleavage of sucrose by an invertase ([38](#)). Unlike the parental strain, W303<sup>Clump</sup> exhibited growth in low concentrations of sucrose when grown in isolation (Fig. 2C). As a result, W303<sup>Clump</sup> grows in co-culture with *cscB*<sup>+</sup> *S. elongatus*, but only



when sucrose secretion was induced (Fig. 2D). Similar to *B. subtilis*, W303<sup>Clump</sup> *S. cerevisiae* demonstrate growth followed by decreased viability in co-culture over 48 hours.

Cyanobacterial light driven metabolism is the source of heterotroph growth inhibition when sucrose is not limiting (Fig. 3A). The lack of monotonic growth in *B. subtilis* and *S. cerevisiae* co-cultures indicate interactions beyond sucrose feeding between heterotrophs and cyanobacteria (Fig. 2A, 2F). To focus on products other than fixed carbon that influence heterotrophic viability and eliminate the confounding variable that cyanobacteria only generate sucrose in the light (23), co-cultures were supplemented with exogenous sucrose and cultivated in the light or dark. After 12 hours of co-cultivation, heterotroph viability of each of the three species was determined, revealing decreased growth or death correlated with increasing concentrations of cyanobacteria solely in illuminated cultures (Fig. 3B-D, Fig. S4). This effect is most apparent in strains of *B. subtilis* (Fig. 3B, Fig. S4A) where the viability of heterotrophic species decreases by orders of magnitude when co-cultured in the light with high concentrations of *S. elongatus*.

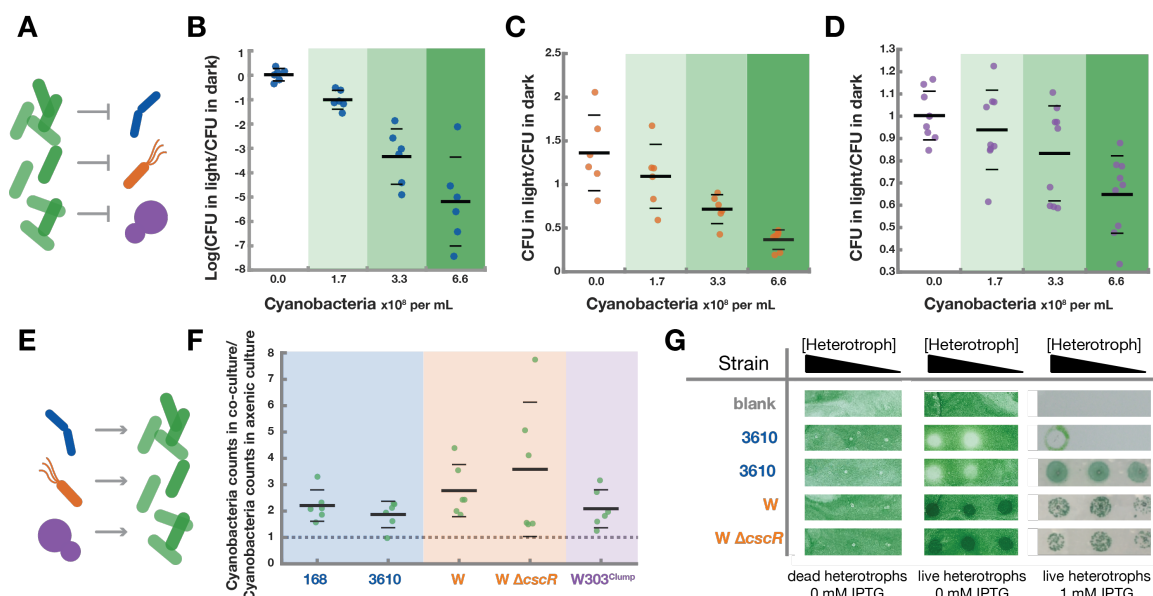

**Fig. 3 Emergent microbial interactions.** Engineered consortia demonstrate emergent interactions that can be classified into two categories: negative effects that cyanobacteria have on heterotrophs (A) and positive effects heterotrophs have on cyanobacteria (E). *B. subtilis* 3610 (B), *E. coli* W  $\Delta cscR$  (C), and W303<sup>Clump</sup> *S. cerevisiae* (B) were co-cultured with various concentrations of *S. elongatus* and heterotroph CFUs were determined after 12 hours of cultivation in either light or dark. Ratios of CFU in light compared to CFU in dark are reported (B-D). Additional strains were tested in Fig. S4. Positive effects of heterotrophs on cyanobacteria (E) were observed in liquid (F), evidenced by the ratio of cyanobacteria cells measured in co-cultures relative to axenic controls after 48 hours in constant light. These co-cultures were inoculated with two orders of magnitude fewer *cscB*<sup>+</sup> *S. elongatus* ( $\sim 1.7 \times 10^6$  cells/mL) than the co-cultures depicted in Fig. 2 ( $\sim 1.7 \times 10^8$  cells/mL), and 1 mM IPTG was added to all cultures to induce sucrose export. Thick horizontal lines represent the average measurement for each condition while thin horizontal lines represent one standard deviation from the mean. Positive effects of heterotrophs on cyanobacteria in previous liquid batch experiments is summarized in Fig. S5. The influence of heterotrophs on cyanobacterial growth on solid media (G) was determined by plating a dilute lawn of *cscB*<sup>+</sup> *S. elongatus* on <sup>CoB</sup>BG-11 agar plates. The cyanobacterial lawn was overlaid with the specified strain in ten-fold serial dilutions of heterotroph and in constant light with or without IPTG.

Conversely, co-culture with heterotrophs can stimulate growth of *S. elongatus* (Fig. 3E, Fig. S5). This was observed during batch cultures when cyanobacteria counts were higher in co-cultures than in control axenic cultures at various time points (Fig. S5). Because batch cultures of relatively dense *S. elongatus* can negatively impact heterotrophic viability (Fig. 2A & 2E, 3A-D), and also lead to significant self-shading, we inoculated low concentrations of cyanobacteria induced with IPTG to secrete sugar in co-culture with heterotrophs. After 48 hours of co-culture, cyanobacteria numbers in co-culture were normalized to axenic controls. We observe significant increases in cyanobacterial growth in the presence of heterotrophic microbes, with total cell counts increasing by between 80 and 250% on average (Fig. 3F). This beneficial effect of heterotrophs can persist on solid media. On a lawn of dilute cyanobacteria induced with or without IPTG, we spotted dilutions of *B. subtilis* or *E. coli* (Fig. 3G). Areas containing *E. coli* and cyanobacteria grew up more quickly than the surrounding lawn of *S. elongatus* alone. The effect of *B. subtilis* on cyanobacteria was more variable and dependent upon induced sucrose export. Without IPTG, spots of *B. subtilis* inhibited cyanobacterial growth however in the presence of IPTG, *B. subtilis* could stimulate growth on or in the vicinity of the spot it was plated (Fig. 3G). *S. cerevisiae* was not assayed in this manner because of poor growth of cyanobacteria on <sup>CoY</sup>BG-11 solid agar plates. Collectively, these experiments indicate that all three evolutionarily unrelated heterotrophs can significantly increase cyanobacterial growth under a range of growth conditions.

# **Robustness in designed photosynthetic consortia**

Co-cultures persist through environmental perturbations. To determine the robustness of each species to varied culture conditions, co-cultures were switched from batch to continuous culture, exposed to alternating light/dark cycles, subjected to dilution or alteration of environment (Fig. 4).

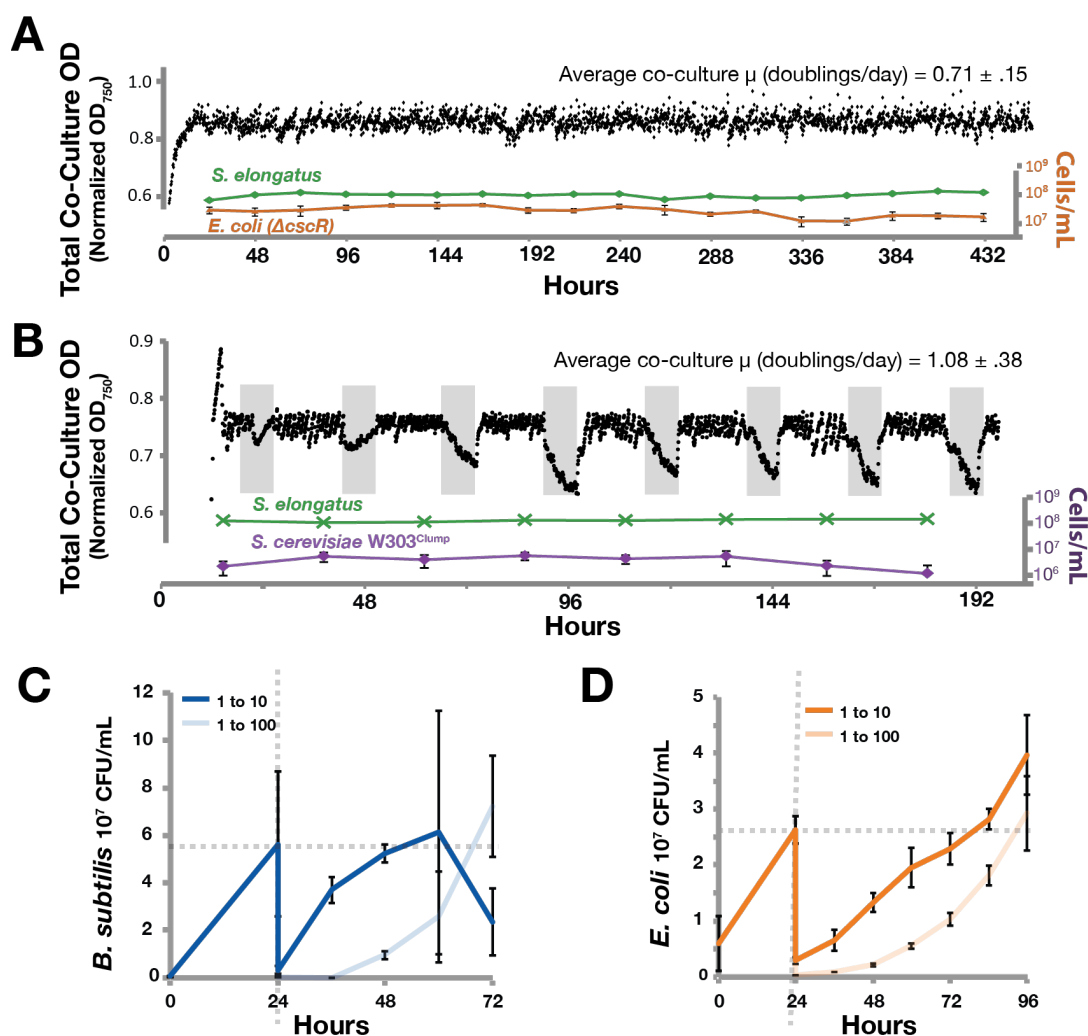

**Fig. 4 Co-cultures persist through time and perturbation.** Representative continuous co-cultures of *E. coli* W  $\Delta cscR$  / *cscB*<sup>+</sup> *S. elongatus* (A) and W303<sup>Clump</sup> *S. cerevisiae* / *cscB*<sup>+</sup> *S. elongatus* (B) were cultured in photobioreactors with 1mM IPTG. *E. coli*-containing consortia were kept in constant light while *S. cerevisiae* communities were exposed to 16:8 hour light/dark photo period (grey spaces represent darkness). Optical density of the entire culture (black scatter plots) as well as counts for the individual cell

types were tracked (green *S. elongatus*, orange *E. coli* W  $\Delta cscR$ , purple W303<sup>Clump</sup> *S. cerevisiae*). Additional photobioreactor cultures for *E. coli* W  $\Delta cscR$  and W303<sup>Clump</sup> *S. cerevisiae* are presented in Fig. S6 and S7, respectively. Extended W303<sup>Clump</sup> *S. cerevisiae*/cscB<sup>+</sup> *S. elongatus* co-cultures are presented in Fig. S8. Recovery of heterotrophs in batch co-cultures of *B. subtilis* 3610/cscB<sup>+</sup> *S. elongatus* (C) or *E. coli* W  $\Delta cscR$ /cscB<sup>+</sup> *S. elongatus* (D) following dilution (vertical dashed grey line) was monitored by viable colony counts. Perturbations on to solid media are presented in Fig. S9.

*E. coli*/*S. elongatus* co-cultures persist through time. Co-cultures of induced cscB<sup>+</sup> *S. elongatus* and W  $\Delta cscR$  *E. coli* were grown continuously in photobioreactors to control cyanobacterial density under constant light (Fig. 4A). Cultures maintain stable ratios for more than two weeks (Fig. 4A, Fig. S6).

Co-cultures of *S. cerevisiae* W303<sup>Clump</sup> and cscB<sup>+</sup> *S. elongatus* are robust over time and through variable light conditions. To further alter culture conditions, cscB<sup>+</sup> *S. elongatus* induced to secrete sucrose was cultured with *S. cerevisiae* W303<sup>Clump</sup> with an alternating diurnal illumination regime (16 light:8 dark, Fig. 4B). Sustained growth in these continuous cultures indicates that yeast persist through periods of darkness when cyanobacteria are unable to supply sucrose or other photosynthates (Fig. 4D, Fig. S7; [Ducat et al. 2012](#)). In similar experiments extended over longer time periods, *S. cerevisiae* maintains viability in continuous culture with sucrose-secreting *S. elongatus* for more than two months (Fig. S8).

Prokaryotic co-cultures with cyanobacteria persist through population bottlenecks and changes in environmental structure. Co-cultures of *B. subtilis*/*S. elongatus* and *E.*

*coli*/*S. elongatus* were subjected to single dilutions (1 to 10 or 1 to 100) to simulate population bottlenecks. Visible cyanobacterial growth occurred throughout these experiments, while heterotroph growth was measured via CFU. In perturbed cultures, heterotrophs can return to pre-dilution levels within three days (Fig. 4C & 4D). To further change environment structure, co-cultures containing *cscB*<sup>+</sup> *S. elongatus* and *B. subtilis* 3610 or  $\Delta cscR$  *E. coli* were moved from liquid to solid environments and back again. This transfer disrupts ratios of different species within co-culture and alters any interactions dependent on the co-culture constituents being in well-mixed environments. After growth of liquid culture on agar, green areas of the agar plate were picked into liquid cultures again disrupting the community and seeding a culture with variable numbers of phototrophs and heterotrophs. Cyanobacterial growth was recovered in constant light followed by the qualitative determination of heterotroph presence. In the majority of cultures both cyanobacteria and the corresponding heterotroph persisted through these perturbations, although *B. subtilis* was lost from the co-culture somewhat more frequently than *E. coli* (Fig. S9).

### **Bioproduction from functionalized co-cultures.**

As multiple species can be co-cultured with *cscB*<sup>+</sup> *S. elongatus*, it is possible to exchange heterotrophs to functionalize consortia for desired activity. In this design, the heterotrophic species of the consortia acts as a “conversion module” to metabolize the products of photosynthesis into target bioproducts in a one-pot reaction (Fig. 5A). We tested two heterotrophic strains capable of producing distinct products: enzymes (Fig. 5B, 5C) and chemical precursors (Fig. 5D).

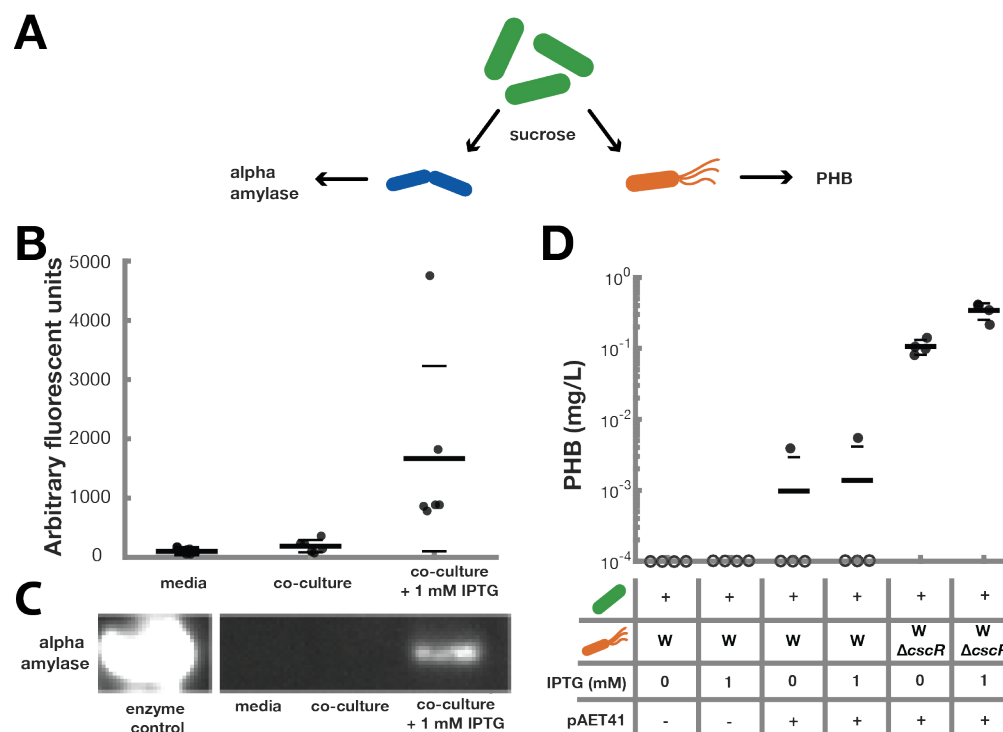

**Fig. 5 Photoproduction of enzymes and metabolites from co-culture.** Flexible functionalization of co-cultures was accomplished via the addition of heterotrophs capable of producing target compounds (A). Alpha-amylase is naturally produced and secreted by *B. subtilis* strain 168. Supernatants from 24-hour cultures of *B. subtilis* 168 alone (blue background) or in co-culture with *cscB*<sup>+</sup> *S. elongatus* (blue and green background) were tested for enzymatic activity (B). Western blots also reveal the presence of alpha-amylase in co-cultures containing IPTG (C). *E. coli* is capable of making PHB when carrying the pAET41 plasmid. Batch co-cultures of *E. coli* (with or without pAET41 to enable PHB production) and *cscB*<sup>+</sup> *S. elongatus* were cultivated for one week with or without IPTG to induce sugar and PHB content of the total culture was analyzed (D). Filled circles represent measured values; hollow circles placed on the x-axis represent cultures in which no PHB was formed or was produced at levels below the detection limit. Thick horizontal lines represent the average measurement for each condition while thin horizontal lines represent one standard deviation from the mean.

Alpha-amylase is produced in co-cultures of *B. subtilis* strain 168 and *cscB*<sup>+</sup> *S. elongatus*. *B. subtilis* is a chassis for enzyme production (39) and strain 168 naturally

produces active alpha-amylase (40). In consortia with *S. elongatus*, *B. subtilis* produces alpha-amylase after 24 hours in constant light (Fig. 5A, 5B). The resulting alpha-amylase is functional as determined by enzymatic assay, and accumulates at significantly higher levels in co-cultures with *cscB*<sup>+</sup> *S. elongatus* induced to secrete sucrose (Fig. 5A).

Engineered *E. coli*/*S. elongatus* communities produce PHB. We co-cultured *E. coli* strains harboring a previously described PHB production plasmid, pAET41 (32) with *cscB*<sup>+</sup> *S. elongatus* for one week in constant light and measured PHB present in the total biomass. As with alpha-amylase production for *B. subtilis*, *E. coli* produces PHB in co-culture with *S. elongatus* (Fig. 5D). While production from the *E. coli* W strain is similar with and without IPTG, the  $\Delta cscR$  *E. coli* W mutants that utilize sucrose more effectively produce significantly more PHB (Fig. 2C, Fig. 5D, Arifin et al. 2011). Furthermore, upon the addition of IPTG, the  $\Delta cscR$  *E. coli* W strain can produce 3 times as much PHB in co-culture than uninduced consortia. Taken together, these results demonstrate that consortia can be flexibly programmed for photoproduction of different bioproducts by employing different heterotrophic organisms.

## Discussion

Our engineered communities demonstrate interactions that cause the flux of fixed carbon to flow from an engineered phototroph to disparate heterotrophs. These consortia divide metabolic labor between partner species: cyanobacteria are responsible for photosynthesis while the heterotrophs consume fixed carbon via heterotrophic



metabolism, making the design inherently modular. In constructing these consortia, we observed unforeseen interactions with common features shared across different heterotrophic species. Namely, we observe that cyanobacterial growth can have negative impacts on heterotrophs, while, conversely, growth of the cyanobacteria is stimulated in the presence of heterotrophs. The significance and implications of these findings are discussed.

Co-cultures containing *B. subtilis* or *S. cerevisiae* rely on induction of sucrose excretion (Fig. 2A, 2E), indicating sucrose availability limits heterotrophic growth. In contrast, *E. coli* receives other forms of fixed carbon from *S. elongatus*, as evidenced by growth in co-cultures with no external carbon source (Fig. 2, Fig. S2). Presumably, *E. coli* must catabolize other metabolites (e.g. secreted fixed carbon or EPS) and growth is independent of IPTG induction because sucrose levels stay too low for *E. coli* utilization during short-term co-culture (Fig. 2C).

Engineering improved sucrose utilization is one general strategy to improve consortia design. In the case of *S. cerevisiae*, limited growth of the wild type W303 yeast was seen in co-culture with *cscB*<sup>+</sup> *S. elongatus* induced to secrete sucrose (Fig. 2E). *S. cerevisiae* metabolizes sucrose by secreting invertase that hydrolyzes sucrose to glucose and fructose; the resulting hexoses are imported, although they can also diffuse away which limits growth at low cell densities in low sucrose environments (31, 41). The engineered W303<sup>Clump</sup> strain has improved sucrose uptake due to increased likelihood that hexoses will be imported instead of diffusing away, and we observed this evolved strain

grow more successfully in co-culture than the wild type W303 (Fig. 2F). Similarly, we tested *W. E. coli* strains with improved sucrose utilization due to a deletion in the repressor of the chromosomally encoded sucrose catabolism, *cscR* (27). While this alteration did not lead to immediate gains in 48 hour batch cultures where sucrose levels remained  $\leq 1$  mg/mL (Fig. 2A, Fig. S2), the mutation greatly increased PHB production in longer experiments when co-cultures were functionalized for bioproduction (Fig. 5D). Taken together, selecting or engineering heterotrophic partners to utilize very low concentrations of sucrose would likely enhance consortia productivity and robustness.

Within these engineered communities we observe emergent interactions between the cyanobacteria and heterotrophs that are consistent across consortia. All three heterotrophs demonstrated decreased growth and viability when exposed to high densities of cyanobacteria in the light (Fig. 3). While the effect is likely multifaceted, a product that is only secreted in the light, including unavoidable byproducts of photosynthesis (e.g. oxygenation and/or reactive oxygen species; [Villa et al. 2015](#)), may be key in this interaction. Consistent with this, many evolved consortia containing oxygenic phototrophs contain partners with strategies to mitigate reactive oxygen species ([36, 42, 43](#)); similar strategies may be employed to further improve the stability of synthetic consortia. It is possible that growth suppression may be caused by competition for media components, however heterotrophs can grow in media conditioned by *S. elongatus* indicating only a minor role for this phenomena ([20, 23](#)).

A second emergent interaction between the microbes within our photosynthetic consortia is the stimulation of phototroph growth in the presence of heterotrophs. It is not known what limitation on *S. elongatus* is being alleviated by the presence of a living partner heterotroph - although these observations are analogous to other natural examples, such as interactions between *Prochlorococcus* and “helper heterotrophs” (42), or experiments where microalgae accumulate more biomass in the presence of other microbes than in isolation (44). However, the generality of the positive effect we observe is somewhat surprising, as the complements of secreted bioproducts from each of the heterotroph species is likely different. Broadly, heterotrophic metabolism is expected to provide additional CO<sub>2</sub>, however our consortia are cultivated in an enriched CO<sub>2</sub> environment (2%) well above atmospheric levels. Instead, we suspect cross-feeding of other metabolite(s). It is possible that many distinct partner heterotrophs could boost yields of *S. elongatus*, a prospect with significant implications for cyanobacterial cultivation. Autotroph/heterotroph co-cultures might also be less susceptible to invasion by contaminating species, a frequent problem of scaled and laboratory experiments (25).

The robustness exhibited by the synthetic communities presented here is a useful feature that may facilitate future studies and applications. For example, we observe that continuous culture enables co-culture conditions that are stable from weeks to months, likely because the density of *S. elongatus* remains low (Fig. 4, Fig. S6-S8) in comparison to batch co-cultures (Fig. 2, Fig. S2). Similarly, co-cultures persist through dilutions of 1 to 10 or 1 to 100 (Fig. 4C & 4D) and can transition between differently structured growth environments (Fig. S9). This stability is a promising feature of the consortia for

academic and applied experiments; for example long-term culture could be used to examine fitness enhancing mutations in one or both species potentially leading to heterotrophs with decreased sensitivity to cyanobacteria in the light or select for physical attachment between phototroph and heterotroph.

Because our engineered system supports the growth of three distinct “workhorse” model microbial organisms, there is flexibility within this platform for industrial and academic applications. As demonstrated, we can take advantage of prior efforts to engineer other microbes and capitalize on the strengths of each species by swapping heterotrophs that produce different compounds. This work has shown that co-culture with cyanobacteria can drive the production of alpha-amylase from *B. subtilis* and PHB from *E. coli* – both commercially relevant products. Exploration of fundamental consortia dynamics through this approach can also take advantage of flexibility within the platform design. For example, target heterotrophic species may be selected based on the general interactions observed here while additional ‘omics level characterization can be pursued in order to illuminate the molecular mechanisms underpinning emergent interactions. With a more complete understanding of the full complement of inter-organismal interactions, it may be possible to install additional control elements to further improve consortial design for academic and bioindustrial purposes.

# **Acknowledgements:**

Special thanks to Chong Liu and the Nocera laboratory for quantifying PHB accumulation and Charleston “Chuck” Noble from the Nowak laboratory for helping us

590 explore mathematical models of our communities. We must also thank the members of  
 591 the Ducat (Jingcheng Huang, Brad Abramson, Eric Young, Josh MacCready, Derek  
 592 Fedeson, Taylor Weiss), and Silver (especially John Oliver, Brendan Colon, Marika  
 593 Ziesack) labs as well as Jenna Chandler, Igor Vieira, and Henry Wettersten for their  
 594 critical reviews of the manuscript. This work was supported by the National Science  
 595 Foundation, Award Numbers 1437657 and DGE1144152, Department of Energy DE-  
 596 SC0012658 ‘Systems Biology of Autotrophic-Heterotrophic Symbionts for Bioenergy’,  
 597 SynBERC, and the Wyss Institute for Biologically Inspired Engineering.

## References

1. **Lindemann SR, Bernstein HC, Song H-S, Fredrickson JK, Fields MW, Shou W, Johnson DR, Beliaev AS.** 2016. Engineering microbial consortia for controllable outputs. *ISME J*.
2. **Hays SG, Patrick WG, Ziesack M, Oxman N, Silver PA.** 2015. Better together: Engineering and application of microbial symbioses. *Curr Opin Biotechnol* **36**:40–49.
3. **Bernstein HC, Carlson RP.** 2012. Microbial Consortia Engineering for Cellular Factories: in vitro to in silico systems. *Comput Struct Biotechnol J* **3**:e201210017.
4. **Widder S, Allen RJ, Pfeiffer T, Curtis TP, Wiuf C, Sloan WT, Cordero OX, Brown SP, Momeni B, Shou W, Kettle H, Flint HJ, Haas AF, Laroche B, Kreft J-U, Rainey PB, Freilich S, Schuster S, Milferstedt K, van der Meer JR, Großkopf T, Huisman J, Free A, Picioreanu C, Quince C, Klapper I, Labarthe S, Smets BF, Wang H, Soyer OS.** 2016. Challenges in microbial ecology: building predictive understanding of community function and dynamics. *ISME J*.
5. **Grube M, Cernava T, Soh J, Fuchs S, Aschenbrenner I, Lassek C, Wegner U, Becher D, Riedel K, Sensen CW, Berg G.** 2014. Exploring functional contexts of symbiotic sustain within lichen-associated bacteria by comparative omics. *ISME J*.
6. **Embree M, Nagarajan H, Movahedi N, Chitsaz H, Zengler K.** 2014. Single-cell genome and metatranscriptome sequencing reveal metabolic interactions of an alkane-degrading methanogenic community. *ISME J* **8**:757–67.
7. **Zengler K, Palsson BO.** 2012. A road map for the development of community

systems (CoSy) biology. *Nat Rev Microbiol* **10**:366–72.

8. **Balagaddé FK, Song H, Ozaki J, Collins CH, Barnet M, Arnold FH, Quake SR, You L.** 2008. A synthetic *Escherichia coli* predator-prey ecosystem. *Mol Syst Biol* **4**:187.
9. **Yurtsev EA, Conwill A, Gore J.** 2016. Oscillatory dynamics in a bacterial cross-protection mutualism. *Proc Natl Acad Sci U S A* **113**:6236–41.
10. **Gore J, Youk H, van Oudenaarden A.** 2009. Snowdrift game dynamics and facultative cheating in yeast. *Nature* **459**:253–6.
11. **Chen Y, Kim JK, Hirning AJ, Josić K, Bennett MR.** 2015. Emergent genetic oscillations in a synthetic microbial consortium. *Science* (80- ) **349**.
12. **Basu S, Gerchman Y, Collins CH, Arnold FH, Weiss R.** 2005. A synthetic multicellular system for programmed pattern formation. *Nature*.
13. **Shou W, Ram S, Vilar JMG.** 2007. Synthetic cooperation in engineered yeast populations. *Proc Natl Acad Sci U S A*.
14. **Tamsir A, Tabor JJ, Voigt CA.** 2011. Robust multicellular computing using genetically encoded NOR gates and chemical “wires.” *Nature* **469**:212–215.
15. **Scott SR, Hasty J.** 2016. Quorum Sensing Communication Modules for Microbial Consortia.
16. **Wintermute EH, Silver PA.** 2010. Emergent cooperation in microbial metabolism. *Mol Syst Biol* **6**:407.
17. **Mee MT, Collins JJ, Church GM, Wang HH.** 2014. Syntrophic exchange in synthetic microbial communities. *Proc Natl Acad Sci U S A* **111**:E2149–56.
18. **Smith MJ, Francis MB.** 2016. A Designed *A. vinelandii*-*S. elongatus* Coculture

for Chemical Photoproduction from Air, Water, Phosphate, and Trace Metals.

ACS Synth Biol.

19. **Ortiz-Marquez JCF, Do Nascimento M, Zehr JP, Curatti L.** 2013. Genetic engineering of multispecies microbial cell factories as an alternative for bioenergy production. *Trends Biotechnol* **31**:521–529.

20. **Niederholtmeyer H, Wolfstädter BT, Savage DF, Silver PA, Way JC.** 2010. Engineering cyanobacteria to synthesize and export hydrophilic products. *Appl Environ Microbiol* **76**:3462–6.

21. **Song H-S, Renslow RS, Fredrickson JK, Lindemann SR.** 2015. Integrating Ecological and Engineering Concepts of Resilience in Microbial Communities. *Front Microbiol* **6**:1298.

22. **Kim HJ, Boedicker JQ, Choi JW, Ismagilov RF.** 2008. Defined spatial structure stabilizes a synthetic multispecies bacterial community. *Proc Natl Acad Sci U S A* **105**:18188–18193.

23. **Ducat DC, Avelar-Rivas JA, Way JC, Silver PA.** 2012. Rerouting carbon flux to enhance photosynthetic productivity. *Appl Environ Microbiol* **78**:2660–8.

24. **Klähn S, Hagemann M.** 2011. Compatible solute biosynthesis in cyanobacteria. *Environ Microbiol* **13**:551–562.

25. **Hays SG, Ducat DC.** 2015. Engineering cyanobacteria as photosynthetic feedstock factories. *Photosynth Res* **123**:285–95.

26. **Bockmann J, Heuel H, Lengeler JW.** 1992. Characterization of a chromosomally encoded, non-PTS metabolic pathway for sucrose utilization in *Escherichia coli* EC3132. *MGG Mol Gen Genet* **235**:22–32.



- 667 27. **Sabri S, Nielsen LK, Vickers CE.** 2013. Molecular control of sucrose utilization  
668 in *Escherichia coli* W, an efficient sucrose-utilizing strain. *Appl Environ Microbiol*  
669 **79**:478–487.
- 670 28. **Arifin Y, Sabri S, Sugiarto H, Krömer JO, Vickers CE, Nielsen LK.** 2011.  
671 Deletion of *cscR* in *Escherichia coli* W improves growth and poly-3-  
672 hydroxybutyrate (PHB) production from sucrose in fed batch culture. *J Biotechnol*  
673 **156**:275–8.
- 674 29. **Kearns DB, Chu F, Branda SS, Kolter R, Losick R.** 2005. A master regulator  
675 for biofilm formation by *Bacillus subtilis*. *Mol Microbiol* **55**:739–49.
- 676 30. **Datsenko KA, Wanner BL.** 2000. One-step inactivation of chromosomal genes in  
677 *Escherichia coli* K-12 using PCR products. *Proc Natl Acad Sci U S A* **97**:6640–5.
- 678 31. **Koschwanez JH, Foster KR, Murray AW.** 2013. Improved use of a public good  
679 selects for the evolution of undifferentiated multicellularity. *Elife* **2013**:1–27.
- 680 32. **Peoples OP, Sinskey AJ.** 1989. Poly-3-hydroxybutyrate (PHB) biosynthesis in  
681 *Alcaligenes eutrophus* H16. Identification and characterization of the PHB  
682 polymerase gene (*phbC*). *J Biol Chem* **264**:15298–15303.
- 683 33. **Lucker BF, Hall CC, Zegarac R, Kramer DM.** 2014. The environmental  
684 photobioreactor (ePBR): An algal culturing platform for simulating dynamic  
685 natural environments. *Algal Res* **6**:242–249.
- 686 34. **Torella JP, Gagliardi CJ, Chen JS, Bediako DK, Colón B, Way JC, Silver PA,**  
687 **Nocera DG.** 2015. Efficient solar-to-fuels production from a hybrid microbial–  
688 water-splitting catalyst system. *Proc Natl Acad Sci* **112**:2337–2342.
- 689 35. **Liu C, Gallagher JJ, Sakimoto KK, Nichols EM, Chang CJ, Chang MCY,**

- Yang P.** 2015. Nanowire–Bacteria Hybrids for Unassisted Solar Carbon Dioxide Fixation to Value-Added Chemicals.
36. **Villa F, Pitts B, Lauchnor E, Cappitelli F, Stewart PS.** 2015. Development of a laboratory model of a phototroph-heterotroph mixed-species biofilm at the stone/air interface. *Front Microbiol* **6**:1–14.
37. **Rossi F, De Philippis R.** 2015. Role of Cyanobacterial Exopolysaccharides in Phototrophic Biofilms and in Complex Microbial Mats. *Life* **5**:1218–1238.
38. **Koschwanez JH, Foster KR, Murray AW, Keller L.** 2011. Sucrose Utilization in Budding Yeast as a Model for the Origin of Undifferentiated Multicellularity.
39. **van Dijk JM, Hecker M.** 2013. *Bacillus subtilis*: from soil bacterium to super-secreting cell factory. *Microb Cell Fact* **12**:3.
40. **Green DM, Colarusso LJ.** 1964. The physical and genetic characterization of a transformable enzyme: *Bacillus subtilis*  $\alpha$ -amylase. *Biochim Biophys Acta - Sect Enzymol Subj* **89**:277–290.
41. **Celiker H, Gore J.** 2012. Competition between species can stabilize public-goods cooperation within a species. *Mol Syst Biol* **8**:621.
42. **Morris JJ, Kirkegaard R, Szul MJ, Johnson ZI, Zinser ER.** 2008. Facilitation of robust growth of *Prochlorococcus* colonies and dilute liquid cultures by “helper” heterotrophic bacteria. *Appl Environ Microbiol*.
43. **Beliaev AS, Romine MF, Serres M, Bernstein HC, Linggi BE, Markillie LM, Isern NG, Chrisler WB, Kucek LA, Hill EA, Pinchuk GE, Bryant DA, Wiley S, Fredrickson JK, Konopka A.** 2014. Inference of interactions in cyanobacterial– heterotrophic co-cultures via transcriptome sequencing. *ISME J*

713            **869**:2243–2255.

714    44.    **Do Nascimento M, Dublan M de los A, Ortiz-Marquez JCF, Curatti L. 2013.**

715            High lipid productivity of an Ankistrodesmus-Rhizobium artificial consortium.

716            Bioresour Technol **146**:400–7.

717

**Table 1. Strain and plasmid collection.**

| Strain                                                | Origin                   |
|-------------------------------------------------------|--------------------------|
| <i>Synechococcus elongatus</i> PCC7942                | ATCC 33912               |
| <i>Synechococcus elongatus</i> trc-lac/cscB           | (23)                     |
| <i>Bacillus subtilis</i> 168                          | ATCC 23857               |
| <i>Bacillus subtilis</i> 3610 $\Delta$ sinI           | (29)                     |
| <i>Escherichia coli</i> K-12 BW25113                  | (30)                     |
| <i>Escherichia coli</i> W                             | ATCC 9637                |
| <i>Escherichia coli</i> W $\Delta$ cscR               | (28)                     |
| <i>Saccharomyces cerevisiae</i> W303                  | Ancestor strain; (31)    |
| <i>Saccharomyces cerevisiae</i> W303 <sup>Clump</sup> | Recreated02 strain; (31) |
| Plasmid                                               |                          |
| pAET41                                                | (32)                     |
